# Supplementary material for: Radiotherapy resistance in chondrosarcoma cells; a possible correlation with alterations in cell cycle related genes
Source: PubMed Central journal article supplement (PMC6540537; doi:10.1186/s13569-019-0119-0), 2019-05-28
Supplement: 13569_2019_119_MOESM1_ESM.pdf [file 13569_2019_119_MOESM1_ESM.pdf]

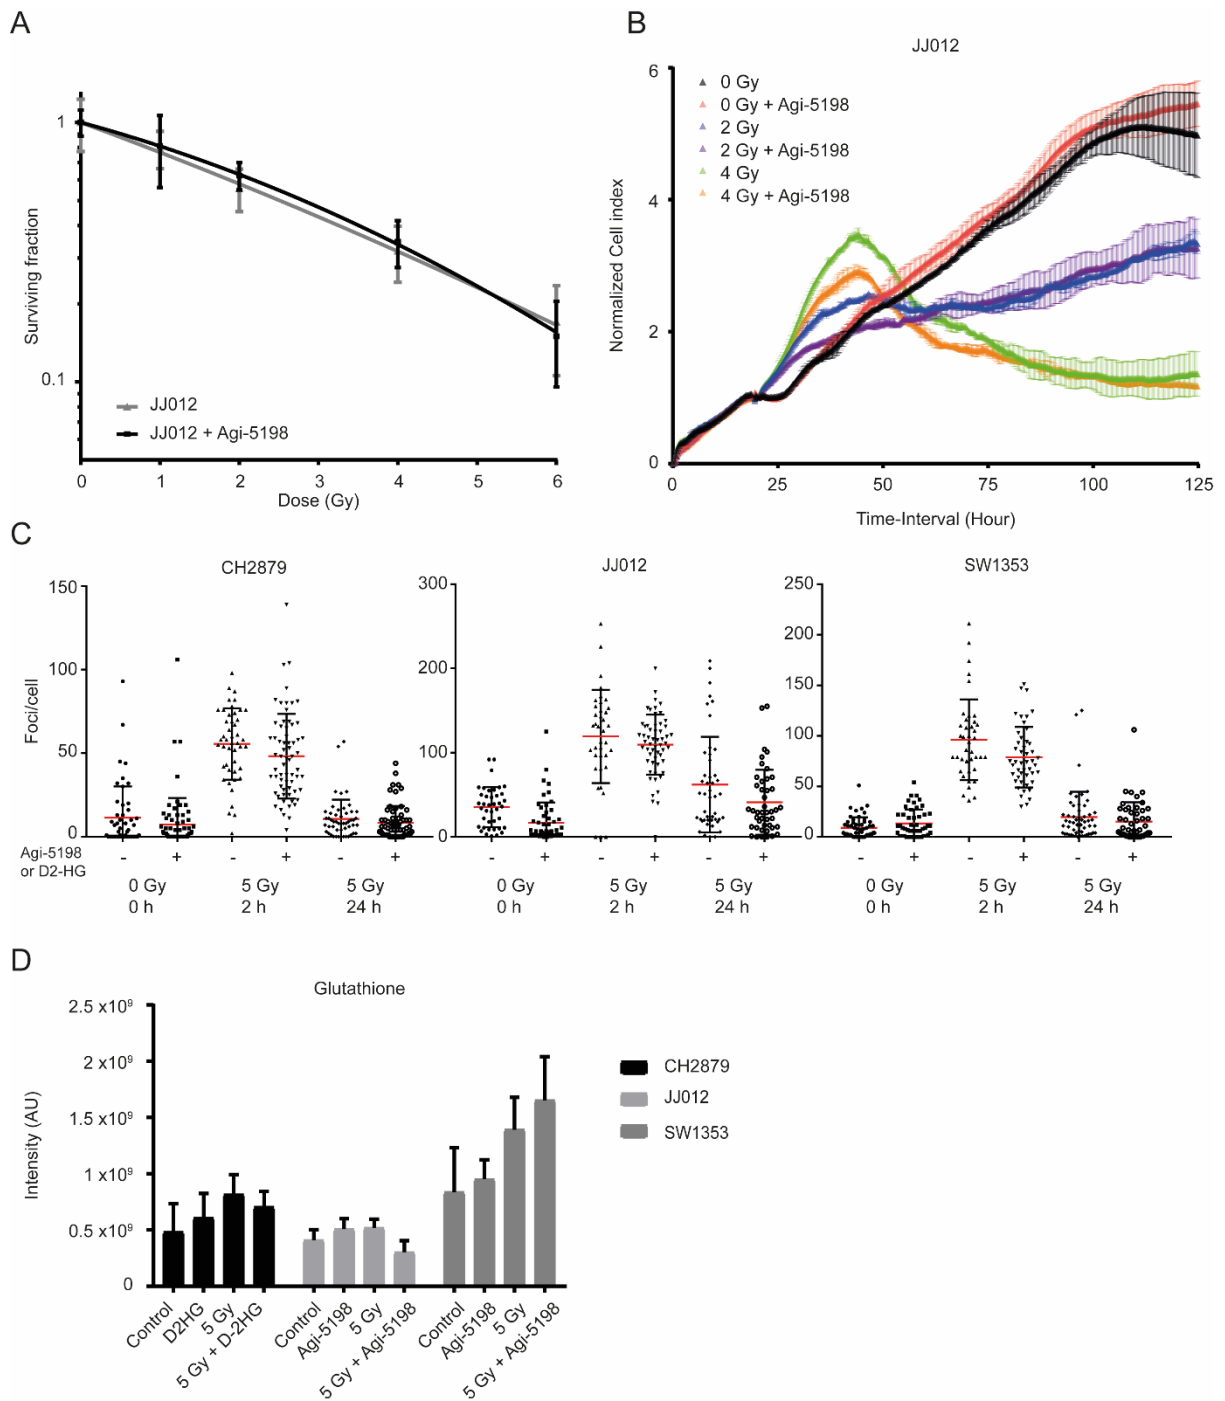

**Additional file 1: Figure S1.1. No relation between *IDH* mutation and radiosensitivity in chondrosarcoma cell lines** **A)** clonogenic assay of JJ012 cells with or without 10  $\mu$ M mutant *IDH1* inhibitor AGI-5198. **B)** normalized cell index of JJ012 cells treated with 0, 2 or 4 Gy radiation in combination with 10  $\mu$ M mutant *IDH1* inhibitor AGI-5198 or DMSO as a control. Black indicates 0 Gy, Red 0 Gy + AGI-5198, blue 2 Gy, Purple 2 Gy + AGI-5198, green 4 Gy, Orange 4 Gy + AGI-5198. **C)**

Amount of  $\gamma$ H2ax foci in CH2879, JJ012 and SW1353 after 2 and 24h of treatment with 5 Gy radiation with and without 10  $\mu$ M AGI-5198 or 250  $\mu$ M D-2HG **D)** glutathione levels of chondrosarcoma cells treated with 10  $\mu$ M AGI-5198 or 250  $\mu$ M D-2HG measured 1h after radiation.

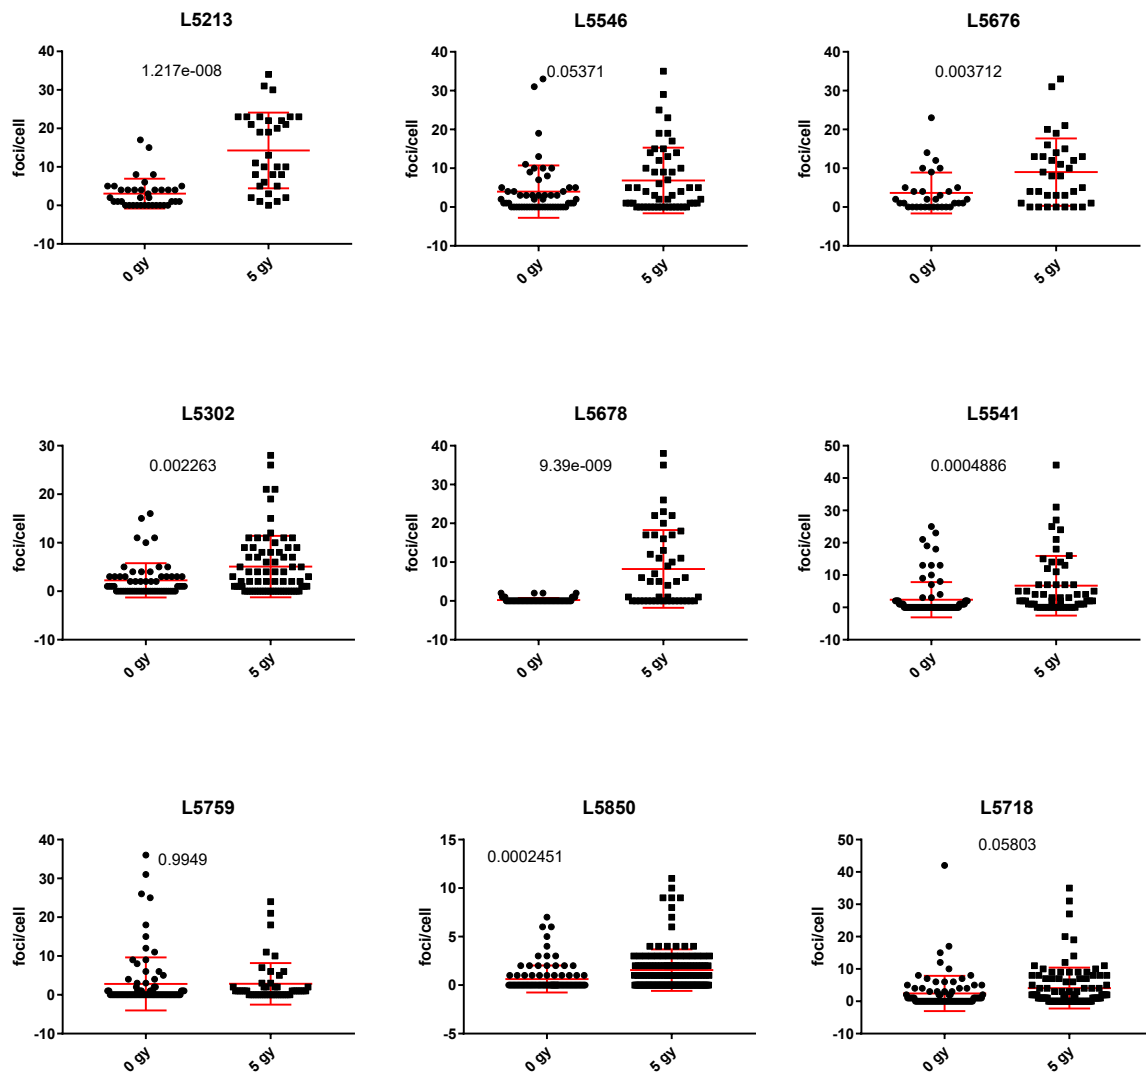

**Additional file 1: Figure S2.**  $\gamma$ -H2ax staining quantification of chondrosarcoma patient samples treated with 5 Gy radiation. Significance was assessed by performing a T-test

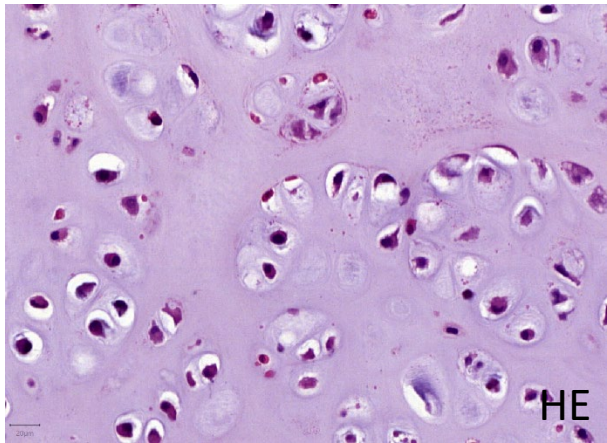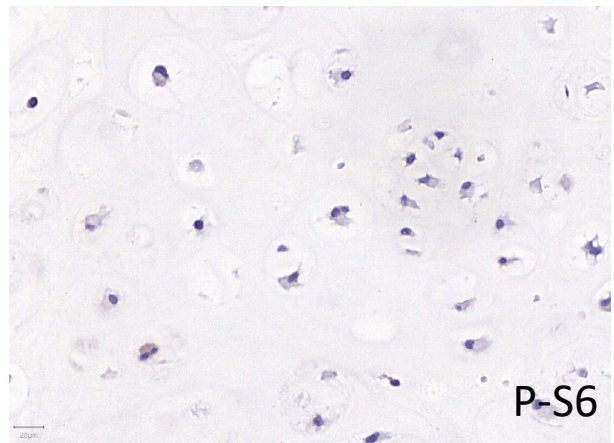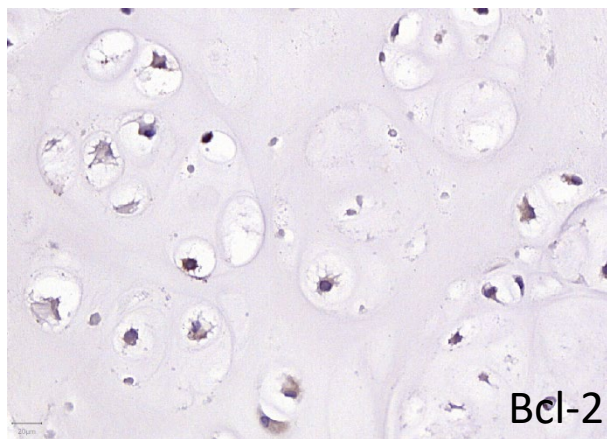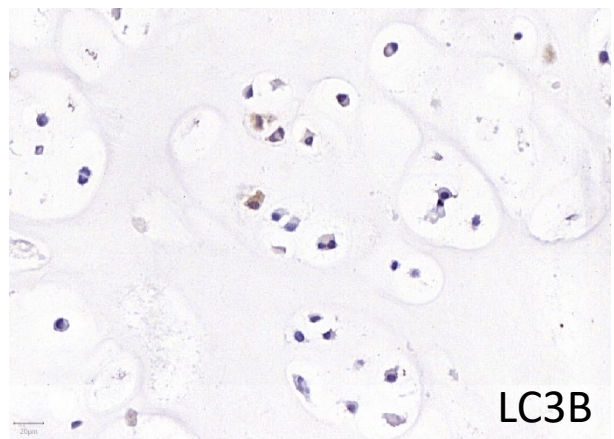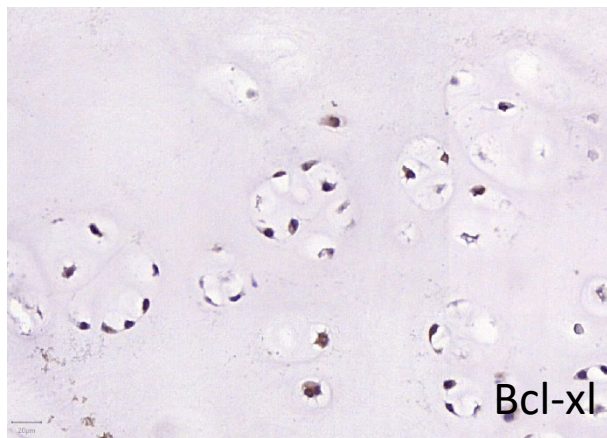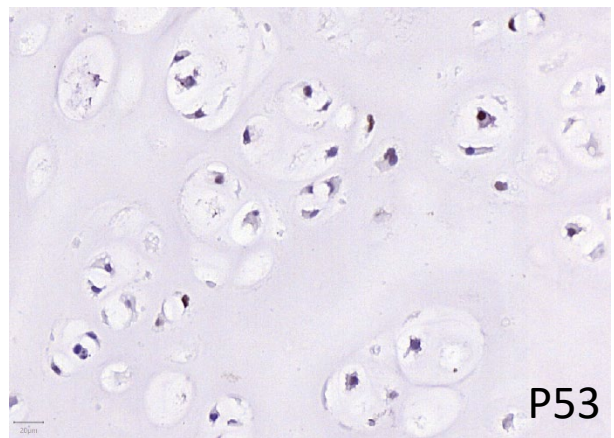

**Additional file 1: Figure S3A L5847**



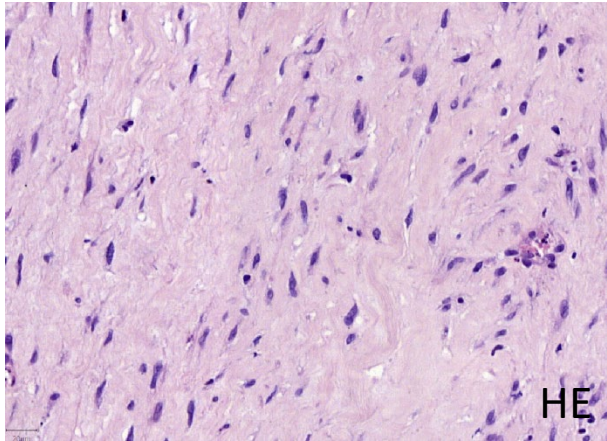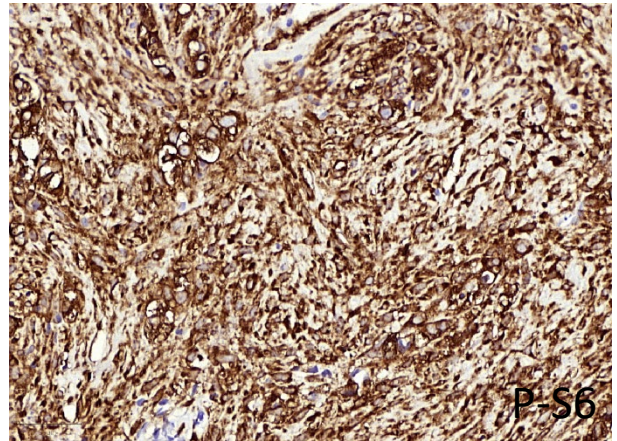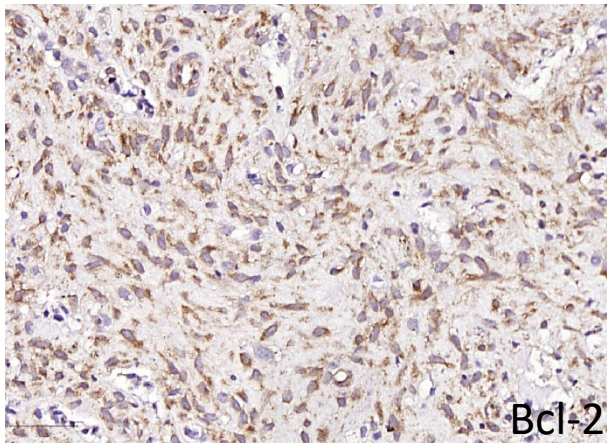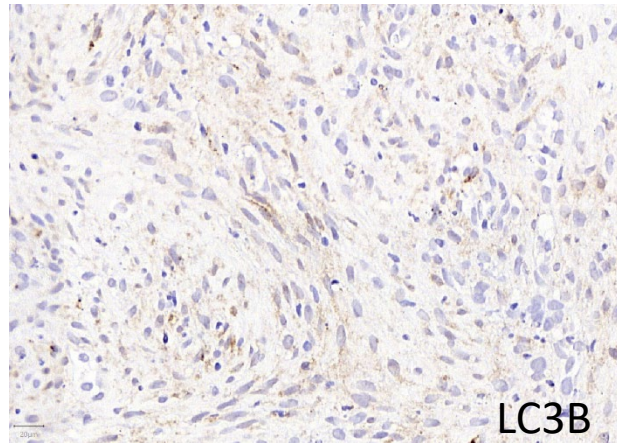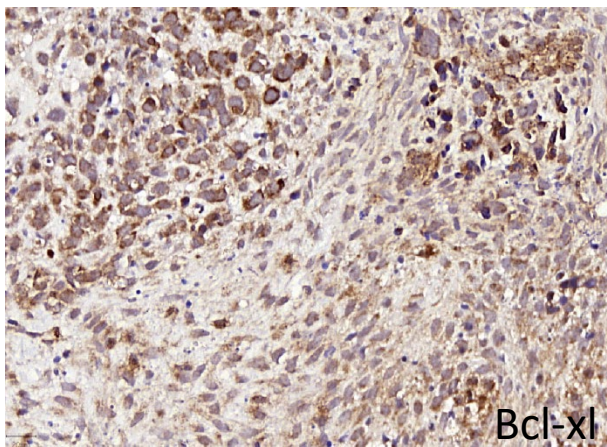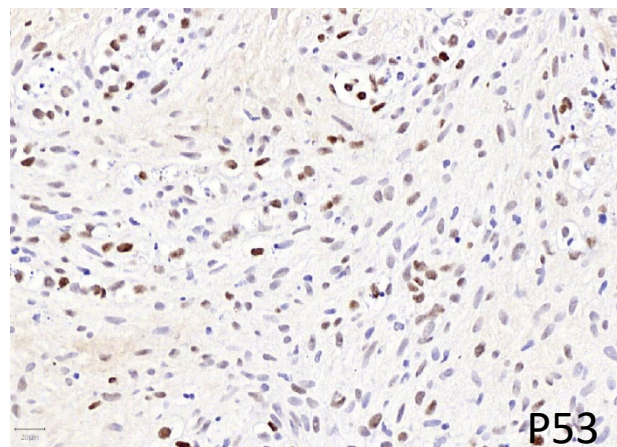

Additional file 1: Figure S3B L5541

**Additional file 1: Table S1.** Conditions of Immunohistochemical staining on chondrosarcoma tissue

| Protein  | Dilution | Blocking | Antigen Retrieval | Positive control | Manufacturer and clone         |
|----------|----------|----------|-------------------|------------------|--------------------------------|
| Bcl-2    | 1:100    | -        | Tris-EDTA         | Tonsil           | Dako clone 124                 |
| Bcl-xl   | 1:400    | 5% Milk  | Citrate           | Prostate         | Cell signalling clone 54H6     |
| Survivin | 1:100    | -        | Citrate           | Placenta         | Cell signalling clone 71G4B7   |
| P-S6     | 1:800    | -        | Citrate           | Melanoma         | Cell signalling clone D57.2.2E |
| P53      | 1:800    | -        | Citrate           | Tonsil           | Dako clone DO-7                |
| LC3B     | 1:40000  | 5% Milk  | Citrate           | Cerebral cortex  | Cell signalling Clone D11      |

**Additional file 1: Table S2.** Mutation analysis of chondrosarcoma cell lines. Results on *IDH* and *TP53* mutation status were published previously (de Jong et al. 2016).

|        | <i>IDH1</i> | <i>IDH2</i> | <i>TP53</i>     | <i>CDKN2A</i>      | <i>KRAS</i> | <i>PTEN</i> |
|--------|-------------|-------------|-----------------|--------------------|-------------|-------------|
| SW1353 | -           | R172S       | V203L           | 9:21971209<br>A-C* | G12C        | -           |
| JJ012  | R132G       | -           | G199V           | -                  | -           | -           |
| CH2879 | -           | -           | S366A<br>R273C# | -                  | -           | R233Ter     |

# only found in 17% of cells

\* mutation found in splice site of intron
